1 **Polygenic contributions to suicidal thoughts and behaviors in a sample ascertained for**  
2 **alcohol use disorders**  
3

4 Sarah MC Colbert<sup>1</sup>, Niamh Mullins<sup>2,3,4</sup>, Grace Chan<sup>5</sup>, Jacquelyn L Meyers<sup>6,7</sup>, Jessica Schulman<sup>3</sup>,  
5 Samuel Kuperman<sup>8</sup>, Dongbing Lai<sup>9</sup>, John Nurnberger<sup>10,9</sup>, Martin H Plawecki<sup>10</sup>, Chella  
6 Kamarajan<sup>6,7</sup>, Andrey P Anokhin<sup>1</sup>, Kathleen K Bucholz<sup>1</sup>, Victor Hesselbrock<sup>5</sup>, Howard J  
7 Edenberg<sup>9,11</sup>, John Kramer<sup>8</sup>, Danielle M Dick<sup>12</sup>, Bernice Porjesz<sup>6,7</sup>, Arpana Agrawal<sup>1</sup>, Emma C  
8 Johnson<sup>1</sup>  
9

10 <sup>1</sup>Department of Psychiatry, Washington University School of Medicine, St. Louis, MO, USA

11 <sup>2</sup>Department of Psychiatry, Icahn School of Medicine at Mount Sinai, New York, New York, USA

12 <sup>3</sup>Department of Genetics and Genomic Sciences, Icahn School of Medicine at Mount Sinai, New  
13 York, New York, USA

14 <sup>4</sup>Mount Sinai Clinical Intelligence Institute, Icahn School of Medicine at Mount Sinai, New York,  
15 New York, USA

16 <sup>5</sup>Department of Psychiatry, University of Connecticut, Farmington, CT, USA

17 <sup>6</sup>Department of Psychiatry and Behavioral Sciences, SUNY Downstate Health Sciences  
18 University, Brooklyn, NY, USA

19 <sup>7</sup>Henri Begleiter Neurodynamics Lab, SUNY Downstate Health Sciences University, Brooklyn,  
20 NY, USA

21 <sup>8</sup>Department of Psychiatry, University of Iowa Carver College of Medicine, Iowa City, IA, USA

22 <sup>9</sup>Department of Medical and Molecular Genetics, Indiana University School of Medicine,  
23 Indianapolis, IN, USA

24 <sup>10</sup>Department of Psychiatry and Stark Neurosciences Research Institute, Indiana University  
25 School of Medicine, Indianapolis, IN, USA

26 <sup>11</sup>Department of Biochemistry and Molecular Biology, Indiana University School of Medicine,  
27 Indianapolis, IN, USA

28 <sup>12</sup>Department of Psychiatry, Rutgers Robert Wood Johnson Medical School, New Brunswick,  
29 NJ, USA  
30

31 **Short Title:** *Polygenic contributions to suicidal thoughts and behaviors*

32  
33 **Corresponding Author:**

34 Sarah Colbert  
35 Department of Psychiatry  
36 Washington University School of Medicine  
37 St. Louis, MO, 63110, USA  
38 [sarah.colbert@wustl.edu](mailto:sarah.colbert@wustl.edu)  
39

40 **Number of Tables:** 2

41 **Number of Figures:** 1

42 **Word count:** 5,215 (including abstract)

43 **Keywords:** polygenic risk scores, suicide, self-harm, suicidal ideation, depression  
44

45 **ABSTRACT**

46 Suicidal thoughts and behaviors have partially distinct genetic etiologies. We used PRS-CS to  
47 create polygenic risk scores (PRS) from GWAS of non-suicidal self-injury, broad sense self-  
48 harm ideation, non-fatal suicide attempt, death by suicide, and depression. Using mixed-effect  
49 models, we estimated whether these PRS were associated with a range of suicidal thoughts  
50 and behaviors in the Collaborative Study on the Genetics of Alcoholism (N = 7,526). All PRS  
51 were significantly associated with suicidal ideation and suicide attempt (betas=0.08-0.44,  
52 FDR<0.023). All PRS except non-suicidal self-injury PRS were associated with active suicidal  
53 ideation and severity of suicidality (betas=0.04-0.22, FDR<0.034). Several associations  
54 remained significant in models where all significant PRS were included as simultaneous  
55 predictors, and when all PRS predicted suicide attempt, the PRS together explained 6.2% of the  
56 variance in suicide attempt. Significant associations were also observed between some PRS  
57 and persistent suicidal ideation, non-suicidal self-injury, attempt severity and desire to die. Our  
58 findings suggest that PRS for depression does not explain the entirety of the variance in suicidal  
59 thoughts and behaviors, with PRS specifically for suicidal thoughts and behaviors making  
60 additional and sometimes unique contributions.

## 61 INTRODUCTION

62  
63 While several risk factors for suicidality are known [1–5], little research has identified which  
64 factors may be particularly important to the progression from suicidal ideation to suicide attempt  
65 to death by suicide [6–8]. Currently, the best predictors of suicide death are the preceding  
66 stages. For example, high level of intent (measured using Beck’s Suicidal Intention Scale [9]) at  
67 previous attempt and having made a medically serious previous attempt were found to be  
68 strong predictors of suicide death [10,11]. However, longitudinal studies following individuals  
69 with a prior non-fatal suicide attempt found that a modest proportion (1.2%-6.7%) die by suicide  
70 [12–14]. In contrast to death by suicide, suicide attempt is well predicted by its risk factors: 29%  
71 of those reporting suicidal ideation and 56% of those reporting ideation and a plan, also endorse  
72 suicide attempts [15].

73  
74 Genome-wide association studies (GWAS) of broad sense self-harm ideation (i.e., thoughts of  
75 self-harm regardless of suicidal intent) [16,17], self-harm [16,17], suicide attempt [18] and death  
76 by suicide [19] have revealed significant SNP-heritability (the proportion of phenotypic variance  
77 that is explained by all SNPs included in a GWAS) estimates ( $h^2_{\text{SNP}}=0.068-0.25$ ). Non-suicidal  
78 self-injury and suicidal thoughts and behaviors are transdiagnostic, co-occurring with psychiatric  
79 disorders ranging from bipolar disorder [20] to eating disorders [21], but are most frequently  
80 studied in the context of depression. Polygenic risk scores (PRS; an estimate of one’s genetic  
81 liability to a trait of interest) for major depressive disorder, depressive symptoms and/or broad  
82 depression are associated with self-reported suicidal thoughts and behaviors ranging from self-  
83 harm (in general) to suicidal ideation, suicide attempt and death by suicide [19,22–27].  
84 However, major depressive disorder [28] is only partially genetically correlated with suicidal  
85 ideation ( $r_g=0.46$ ) [17] and suicide attempt ( $r_g=0.78$ ) [18] and depression [29] is also not  
86 perfectly genetically correlated with death by suicide ( $r_g=0.42$ ) [30]. Some studies have found  
87 significant associations between observed suicidal thoughts and behaviors and PRS of self-  
88 harm [16,23] and suicide attempt [18,24,31]. However, with the exception of a recent study from  
89 Mullins *et al.* [18] which identified a significant association between suicide attempt and a PRS  
90 constructed from a GWAS of suicide attempt conditioned on major depressive disorder [18],  
91 little research has explored whether genetic liability to non-suicidal self-injury and suicidal  
92 thoughts and behaviors that are independent from genetic liability to depression explain  
93 variance in suicidal thoughts and behaviors. Thus, validating the transdiagnostic heritability of  
94 various aspects of suicidal thoughts and behaviors requires that PRS constructed from GWAS  
95 of non-suicidal self-injury and suicidal thoughts and behaviors be examined in other samples to  
96 estimate whether this polygenic liability is an independent predictor of suicidal thoughts and  
97 behaviors, beyond the genetics of depression. Such independent effects would further solidify  
98 the need to consider the genetics of suicidal thoughts and behaviors as transdiagnostic markers  
99 of liability to a broad range of psychopathology with suicidal thoughts and behaviors as  
100 components.

101  
102 Non-suicidal self-injury and suicidal thoughts and behaviors may represent a genetically  
103 heterogeneous set of phenotypes. However, genetic research to date has struggled to  
104 investigate this question due to the common overlap amongst these phenotypes. Twin and  
105 family studies have been best able to answer these questions using distinct phenotypes; for  
106 example, a recent study from Kendler *et al.* [32] found evidence to suggest that suicide attempt  
107 and death by suicide are genetically distinct in ways beyond severity. Still, some relationships  
108 between these phenotypes are less clear, with some twin studies having found that a large  
109 portion of the variation in suicide attempt is explained by genetic factors shared with non-  
110 suicidal self-injury [33] and that the two behaviors share a genetic correlation of 0.94 [34], while  
111 a study from Russell *et al.* [35] was not able to identify any genetic correlation between non-

112 suicidal self-injury and suicide attempt, although in a considerably smaller sample. Ability to  
113 explore these genetic relationships using GWAS data has been much more limited by omnibus  
114 phenotype definitions. For example, GWAS of suicide attempt frequently include cases who  
115 have died by suicide [25], and GWAS of self-harm behavior often do not specify intent,  
116 consequently combining non-suicidal self-injury and suicide attempt into one measure [16,17].  
117 The inconsistent findings regarding genetic similarities and distinctions between suicidal  
118 thoughts and behaviors necessitate further exploration using current, well-powered GWAS data.

119  
120 Using GWAS of non-suicidal self-injury, broad sense self-harm ideation [36], non-fatal suicide  
121 attempt [18], death by suicide [19] and depression [29,37], we examined whether polygenic  
122 liability to these phenotypes was associated with 11 suicidal thoughts and behaviors in  
123 individuals in the Collaborative Study on the Genetics of Alcoholism (COGA). As COGA was  
124 primarily ascertained for alcohol use disorders (AUD), individuals in the sample may have  
125 elevated risk for other mental health conditions including suicidal thoughts and behaviors, and  
126 its independent assessment of these suicidal thoughts and behaviors apart from depression  
127 supports the use of COGA to address these questions. We hypothesized that: (1) PRS for  
128 suicidal thoughts and behaviors would explain additional, unique variance in suicidal thoughts  
129 and behaviors, beyond that explained by depression PRS and (2) non-suicidal self-injury would  
130 be genetically distinct from suicidal thoughts and behaviors.

## 131 132 **METHODS**

### 133 **DATA**

#### 134 **Target Dataset**

135 COGA was designed to investigate the genetic underpinnings of AUD and has collected data  
136 from extended families with an extensive AUD history as well as comparison families from the  
137 community [38–40]. Using the Semi-Structured Assessment for the Genetics of Alcoholism  
138 (SSAGA) interview [41,42], COGA collected data from all participants, on a wide variety of  
139 mental health phenotypes, including depression and, independently, suicidal thoughts and  
140 behaviors. Many questions about suicidal thoughts and behaviors were nested, meaning that  
141 they were only asked as follow-up questions to individuals endorsing a pre-requisite variable.  
142 For example, data for active suicidal ideation was only collected for individuals who endorsed  
143 any suicidal ideation. The nine mental health phenotypes used in the current study are:

- 144 • Non-suicidal self-injury: Individuals were asked, “(Other than when you tried to take  
145 your own life,) did you ever hurt yourself on purpose, for example, by cutting or burning  
146 yourself?”
- 147 • Suicidal ideation: Individuals were asked, “Have you ever thought about killing  
148 yourself?”
  - 149 ○ Active suicidal ideation: Individuals endorsing suicidal ideation were  
150 subsequently asked “Did you have a plan? (Did you actually consider a way to  
151 take your life?)”
  - 152 ○ Persistent suicidal ideation: Individuals endorsing suicidal ideation were  
153 subsequently asked “Did those thoughts persist for at least 7 days in a row?”
- 154 • Suicide attempt: Individuals were asked “Have you ever tried to kill yourself?”
  - 155 ○ More than one attempt: Individuals who endorsed a suicide attempt were asked  
156 “How many times (did you try to kill yourself)?”. Affected individuals answered  
157 more than once.
  - 158 ○ Medical treatment after attempt: Individuals who endorsed a suicide attempt  
159 were asked “Did you require medical treatment after you tried to kill yourself?”
  - 160 ○ Substance use prior to attempt: Individuals who endorsed a suicide attempt  
161 were asked “Did you try to kill yourself after you had been drinking?” and “Did

162 you try to kill yourself after using drugs?”. Affected individuals answered yes to  
163 either one or both of these questions.  
164 ○ Desire to die: Individuals who endorsed a suicide attempt were asked “Did you  
165 really want to die?”. Affected individuals answered “maybe” or “yes” to this  
166 question. It may seem inconsistent that an individual would endorse having  
167 attempted suicide and answer no to this question, however suicidal desire and  
168 suicidal intent may actually be separate facets of suicidality [43], with only the  
169 latter being required to classify self-injurious behavior as an attempt.  
170 Considering this, individuals answering this question retrospectively may have  
171 responded no if they experienced regret during their attempt or upon reflection  
172 realized they may not have truly wanted to die despite intending to die.  
173

174 In addition to the above SSAGA defined phenotypes, we constructed a binary variable (“attempt  
175 severity”) which compared individuals with a suicide attempt and at least one co-occurring  
176 behavior considered to make it more severe (more than one attempt, requiring medical  
177 treatment after an attempt, substance use prior to an attempt, desire to die) to individuals  
178 endorsing only a single suicide attempt with no co-occurring conditions. We also created an  
179 ordinal variable measuring “severity of suicidality”. To do so, we first created a measure in which  
180 individuals were given a score of 0 to 4, with increasing scores reflecting greater severity, i.e.,  
181 no suicidal thoughts and behaviors= 0, non-suicidal self-injury= 1, suicidal ideation= 2,  
182 persistent or active suicidal ideation= 3, and suicide attempt= 4. For individuals with multiple  
183 assessments, an assignment was made using the highest endorsed category. A description of  
184 all binary phenotypes and their prevalence in the sample can be found in **Table 1**.  
185

186 As discovery GWAS (see below) were only available in samples of European ancestry, and  
187 accuracy of PRS prediction is low when genetic ancestries of discovery and target datasets  
188 differ, our analyses were limited to individuals of European genetic ancestry. Genetic data and  
189 analysis covariates were available for 7,646 individuals of European ancestry. The data  
190 processing has been described in more detail previously [44]. Because the COGA sample was  
191 genotyped using multiple arrays, QC focused on a common set of 47,000 high quality variants  
192 that were genotyped in all arrays, and duplicate individuals were removed. Briefly, variants were  
193 imputed separately for each array using the Haplotype Reference Consortium panel and were  
194 filtered to only include SNPs with INFO scores > 0.8, minor allele frequency > 0.01 and that  
195 passed Hardy-Weinberg equilibrium (HWE  $p < 10^{-6}$ ).  
196

## 197 **Discovery Datasets**

198 We used summary statistics from existing GWAS of broad sense self-harm ideation, non-fatal  
199 suicide attempt, death by suicide and depression and constructed our own GWAS of non-  
200 suicidal self-injury to calculate PRS for individuals in the COGA sample.

- 201 • Broad sense self-harm ideation: GWAS summary statistics (N= 135,819) were derived  
202 from European individuals in the UK Biobank who answered either “No”, “Yes, *once*”, or  
203 “Yes, *more than once*” to “*Have you contemplated harming yourself (for example by*  
204 *cutting, biting, hitting yourself or taking an overdose)?*” (Data-Field 20485, and was  
205 analyzed as an ordinal variable, i.e., “No”= 0, “Yes, *once*”= 1 and “Yes, *more than*  
206 *once*”= 2). We refer to this form of thinking as broad sense self-harm ideation as suicidal  
207 intent could not be determined. The summary statistics were downloaded from the Pan-  
208 UKB GWAS results (<https://pan.ukbb.broadinstitute.org>).  
209 • Non-fatal suicide attempt: Suicide attempt summary statistics came from a meta-  
210 analysis of GWAS of suicide attempt by the International Suicide Genetics Consortium  
211 (ISGC) using a combination of clinical interviews, self-report questionnaires, hospital  
212 records and ICD-10 codes [18]. Suicide attempt cases were categorized as individuals



213 who made a non-fatal suicide attempt (an act of self-harm performed with intent to die)  
214 or died by suicide (~20% of cases). As there is prior evidence to suggest partly distinct  
215 genetic etiologies of suicide attempt and death by suicide [45], we obtained summary  
216 statistics from a GWAS of non-fatal suicide attempt only (i.e., excluding individuals who  
217 had died by suicide) from the ISGC (N= 507,744, N case= 23,767) in order to keep these  
218 phenotypes independent.

- 219 • Death by suicide: GWAS summary statistics (N= 18,223, N case= 3,413) were taken  
220 from data from the Utah Office of the Medical Examiner [19].
- 221 • Non-suicidal self-injury: Previous GWAS have not specifically looked at non-suicidal self-  
222 injury, disentangling it from suicide attempt, so we conducted our own GWAS for non-  
223 suicidal self-injury in the UK Biobank sample using SAIGE [46]. A direct measure of non-  
224 suicidal self-injury is not provided by the UK Biobank; however, we derived this  
225 phenotype using information from the UK Biobank's on-line "Thoughts and Feelings"  
226 mental health questionnaire. The questionnaire asked individuals "*Have you deliberately*  
227 *harmed yourself, whether or not you meant to end your life?*" (Data-Field 20480, N =  
228 137,969), and those who answered "Yes" (N = 5,924) were then asked in a follow-up  
229 question, "*Have you harmed yourself with the intention to end your life?*" (Data-Field  
230 20483). Individuals who answered yes to both questions (N = 3,056), indicating self-  
231 harm with suicidal intent, were excluded from our analyses. After quality control (see  
232 below), we were left with a remaining sample size of 133,620 individuals (N cases =  
233 2,845). SAIGE performs a GWAS in two steps: first, it uses individual level genotype  
234 data to fit the null logistic model, then uses imputed dosage data to perform the  
235 association tests [46]. Step 1 of SAIGE used genotype array data (i.e., non-imputed)  
236 which was filtered to exclude variants with > 5% missingness, Hardy-Weinberg  
237 equilibrium p-values below 1e-10 and minor allele frequency < 0.05. Following QC,  
238 genotype array data underwent LD pruning in PLINK (using the command --indep-  
239 pairwise 50 5 0.2). Step 2 of SAIGE was performed using imputed dosages downloaded  
240 from the UK Biobank filtered for INFO score > 0.9, minor allele frequency > 0.01 and  
241 minor allele count > 20. We limited our UK Biobank sample to individuals of European  
242 genetic ancestry using the ancestry assignments published by the Pan-UKB team [36].  
243 Following the procedure from Zhou et al. (2018), we included sex, age and the first 10  
244 genetic principal components (provided by the Pan-UKB team) as covariates in the  
245 GWAS. We implemented the leave-one-chromosome-out option in SAIGE. The GWAS  
246 produced no genome-wide significant ( $p < 5e-8$ ) results; the strongest association ( $p =$   
247  $9.21e-7$ ) was at lead SNP rs72778956 on chromosome 10 (Figure S1, Table S1).
- 248 • Depression: We used METAL [47] to meta-analyze two GWAS of depression (N=  
249 750,414, N case= 254,566): one from the Million Veteran Program sample [37] and the  
250 other from a previous meta-analysis of the UK Biobank and Psychiatric Genomics  
251 Consortium [29].

## 252 ANALYSES

### 253 Polygenic risk scores

254 PRS in COGA individuals were calculated with PRS-CS [48], using effect sizes from the  
255 previously mentioned GWAS summary statistics. For depression and non-fatal suicide attempt,  
256 we allowed the software to learn the global shrinkage parameter from the data. However, when  
257 calculating PRS using the non-suicidal self-injury, broad sense self-harm ideation and death by  
258 suicide GWAS, for which sample sizes were more limited, we manually set the global shrinkage  
259 parameter  $\phi=1e-2$  (following guidance from the PRS-CS development team and others  
260 [48,49]). We used PLINK's --score command [50] to produce individual level PRS in the COGA  
261 sample. PRS were scaled to a standard normal distribution.  
262  
263

## 264 **Association Models**

265 We used logistic mixed-effect regression models to formally test for associations between the  
266 non-suicidal self-injury, broad sense self-harm ideation, non-fatal suicide attempt, death by  
267 suicide and depression PRS and suicidal thoughts and behaviors in COGA. As an exception,  
268 we used a linear mixed-effect regression model to test for associations between PRS and the  
269 ordinal severity of suicidality variable we constructed. All models included sex, age at last  
270 interview, genotyping array, and the first 10 genetic principal components as fixed covariates  
271 and family ID as a random intercept. Due to the ascertainment strategy for COGA families, we  
272 also tested whether significant associations between the PRS and suicidal thoughts and  
273 behaviors remained after additionally including AUD as a covariate. We used the MuMIn [51]  
274 package in R to calculate pseudo- $R^2$  (percent variance explained) values.  
275

276 For suicidal thoughts and behaviors that were associated with multiple PRS, we constructed  
277 follow-up “multi-PRS” models which accounted for those PRS as predictors simultaneously. For  
278 all models, we considered false discovery rate (FDR)  $< 0.05$  as significant. FDR was calculated  
279 separately in each set of models, i.e., across the main single PRS models, then across the  
280 models covarying for AUD, then across the multi-PRS models.  
281

## 282 **Average PRS Visualization**

283 To visualize the mean PRS values for affected and unaffected individuals, we fit a mixed effects  
284 model to get PRS residual values by regressing the following covariates on the PRS: sex, age  
285 at last interview, genotyping array, the first 10 genetic principal components, and family ID (as a  
286 random effect). For each suicidal thought or behavior, we split individuals into “affected” and  
287 “unaffected” groups and then calculated the average PRS residuals and standard errors in each  
288 of the groups for visualization purposes (shown in Fig. 1). As this figure compares affected and  
289 unaffected groups, only original binary phenotypes from COGA are included in the figure (i.e.,  
290 derived phenotypes including attempt severity and severity of suicidality are excluded).  
291

## 292 **Genetic correlations**

293 We calculated genome-wide genetic correlations ( $r_g$ ) among the five GWAS using LD score  
294 regression [52].  
295

## 296 **RESULTS**

297 To maximize the total sample size in each model, our analytic sample included individuals who  
298 had complete genetic data, information for all covariates and data for at least one suicidal  
299 thought or behavior (e.g., individuals with suicide attempt data but not non-suicidal self-injury  
300 data could still be included in the models with suicide attempt as an outcome). A total of 6,434  
301 individuals had data on non-suicidal self-injury (prevalence= 0.09; see Table 1). 7,526  
302 individuals had data on suicidal ideation (prevalence= 0.43) and suicide attempt (prevalence=  
303 0.11). Of those self-reporting suicidal ideation, 41% indicated active suicidal ideation and 31%  
304 indicated persistent ideation. In the group of individuals self-reporting suicide attempt, 40% had  
305 endorsed more than one attempt. Those who self-reported a suicide attempt were asked follow-  
306 up questions about their attempt, or if they had endorsed multiple attempts were asked follow-  
307 up questions in regards to their most serious attempt. Of these individuals who reported at least  
308 one suicide attempt, 44% required medical treatment after their attempt, 45% had used a  
309 substance prior to their attempt and 72% had indicated desire to die.  
310

311 PRS were correlated with each other to varying degrees (see Table S2), with the highest  
312 correlation between non-fatal suicide attempt and depression ( $r = 0.29$ ) and the lowest  
313 correlation between non-suicidal self-injury and death by suicide ( $r = 0.02$ ). Overall, we found  
314 that average PRS residual values were higher in individuals endorsing suicidal thoughts or

315 behaviors compared to their counterparts who did not endorse suicidal thoughts or behaviors  
316 (shown in Fig. 1), although when formally testing for associations between PRS and observed  
317 suicidal thoughts and behaviors using logistic mixed-effect regression models, not all  
318 associations were significant after FDR corrections (shown in Table 2).

319  
320 We found that all PRS were significantly associated with suicidal ideation (beta= 0.08-0.31, se=  
321 0.026-0.028, FDR < 0.004,  $R^2 = 0.002-0.025$ ) (shown in Table 2). Given that all PRS were  
322 significantly associated with suicidal ideation in separate models, we constructed a multi-PRS  
323 model in which all five PRS simultaneously predicted suicidal ideation. In the multi-PRS model,  
324 the depression, non-fatal suicide attempt and broad sense self-harm ideation PRS remained  
325 significantly associated with suicidal ideation (FDR <  $1.10e-3$ ), while the death by suicide PRS  
326 and non-suicidal self-injury PRS were no longer significantly associated with suicidal ideation  
327 (shown in Table S3).

328  
329 Similarly, we observed that all PRS were significantly associated with suicide attempt (beta=  
330 0.10-0.44, se= 0.040-0.044, FDR < 0.023,  $R^2 = 0.003-0.047$ ), but the strongest association was  
331 with non-fatal suicide attempt PRS and the weakest association was with the non-suicidal self-  
332 injury PRS. In the follow-up multi-PRS model which included all PRS as simultaneous predictors  
333 ( $R^2 = 0.062$ ), associations only remained significant between suicide attempt and the  
334 depression and non-fatal suicide attempt PRS.

335  
336 Active suicidal ideation was significantly associated with all PRS (beta= 0.14-0.22, se= 0.039-  
337 0.043, FDR < 0.003,  $R^2 = 0.005-0.011$ ) except for the non-suicidal self-injury PRS, and  
338 associations with all PRS remained significant, although they were slightly weaker, in the multi-  
339 PRS model (beta= 0.11-0.16, se= 0.041-0.045, FDR < 0.024,  $R^2 = 0.023$ ). We also observed  
340 significant, although comparatively weak, associations between severity of suicidality and all  
341 PRS (beta= 0.04-0.10, se= 0.015-0.016, FDR < 0.034,  $R^2 = 0.002-0.013$ ) except for the non-  
342 suicidal self-injury PRS. In the multi-PRS model in which all PRS, except for the non-suicidal  
343 self-injury PRS, simultaneously predicted severity of suicidality ( $R^2 = 0.021$ ), only the depression  
344 and non-fatal suicide attempt PRS remained significant predictors (shown in Table S3).

345  
346 Persistent suicidal ideation was significantly associated with the depression PRS (beta= 0.12,  
347 se= 0.042, FDR= 0.016,  $R^2 = 0.003$ ) and non-fatal suicide attempt PRS (beta= 0.18, se= 0.044,  
348 FDR=  $2.2e-4$ ,  $R^2 = 0.007$ ). However, in the multi-PRS model, the association between persistent  
349 suicidal ideation and the depression PRS was no longer significant, while the association with  
350 the non-fatal suicide attempt PRS remained significant (beta= 0.16, se= 0.05, FDR= 0.002).  
351 Desire to die was only significantly associated with non-fatal suicide attempt PRS (beta= 0.26,  
352 se= 0.098, FDR= 0.019,  $R^2 = 0.009$ ); similarly, attempt severity was only associated with the  
353 non-fatal suicide attempt PRS (beta= 0.33, se= 0.15, FDR= 0.049,  $R^2 = 0.017$ ).

354  
355 Non-suicidal self-injury was significantly associated with all PRS (beta= 0.16-0.24, se= 0.049-  
356 0.053, FDR < 0.0035,  $R^2 = 0.005-0.011$ ) except for the death by suicide PRS. Notably, in the  
357 multi-PRS model in which non-suicidal self-injury was predicted by all PRS except for the death  
358 by suicide PRS, associations with the PRS remained significant with the exception of non-  
359 suicidal self-injury's association with the non-suicidal self-injury PRS. More than one attempt,  
360 requiring medical treatment after an attempt and substance use prior to an attempt were not  
361 significantly associated with any of the PRS (shown in Table 2).

362  
363 Additionally, we tested whether PRS remained significantly associated with suicidal thoughts  
364 and behaviors after controlling for AUD by adding it as an additional covariate in the models. We



365 found that all previously significant associations (shown in Table 2) remained significantly  
366 associated (FDR < 0.05) in the models covarying for AUD (shown in Table S4).

367  
368 Finally, we calculated significant, positive genetic correlations amongst all five GWAS ( $r_g = 0.54-$   
369  $0.84$ , all  $p < 6e-4$ ; shown in Table S5). Death by suicide and suicide attempt were most strongly  
370 genetically correlated ( $r_g = 0.84$ ,  $se = 0.08$ ,  $p = 7.1e-24$ ), while the weakest genetic correlation  
371 was observed between death by suicide and self-harm ideation ( $r_g = 0.53$ ,  $se = 0.11$ ,  $p = 9.2e-$   
372  $7$ ). In general, non-suicidal self-injury had the weakest genetic correlations with the other traits  
373 ( $r_g = 0.54-0.69$ ,  $se = 0.09-0.16$ , all  $p < 6e-4$ ).

## 374 375 376 **DISCUSSION**

377 We explored the associations of polygenic liability for non-suicidal self-injury, broad sense self-  
378 harm ideation, non-fatal suicide attempt, death by suicide, and depression with a variety of  
379 suicidal thoughts and behaviors observed in the COGA sample, a family-based sample that was  
380 enriched for AUD diagnoses. All PRS were significantly associated with suicidal ideation and  
381 suicide attempt, and active suicidal ideation and severity of suicidality were associated with all  
382 PRS except for the non-suicidal self-injury PRS. In models where depression and suicidal  
383 thoughts and behaviors were included as simultaneous predictors, many associations remained  
384 significant, supporting our hypothesis that while genetic liability to suicidal thoughts and  
385 behaviors and depression are related, they retain some independent genetic contributions to  
386 suicidal thoughts and behaviors. On the other hand, non-suicidal self-injury PRS did not remain  
387 significantly associated with any self-harm behaviors in COGA after accounting for the  
388 depression and suicidal thoughts and behaviors PRS, suggesting that beyond its shared  
389 genetics with the other PRS, non-suicidal self-injury PRS is not significantly associated with  
390 suicidal thoughts and behaviors in this sample. Additionally, in models testing the association  
391 between single PRS and active suicidal ideation and severity of suicidality, non-suicidal self-  
392 injury PRS was the only PRS that was not significantly associated, further suggesting that non-  
393 suicidal self-injury is somewhat genetically distinct from suicidal thoughts and behaviors. A  
394 follow-up exploratory analysis in which we calculated genetic correlations between the non-  
395 suicidal self-injury and suicidal thoughts and behaviors GWAS provided partial support for a  
396 genetic distinction, as the genetic correlations between non-suicidal self-injury and the suicidal  
397 thoughts and behaviors GWAS ( $r_g = 0.54-0.69$ ) were, for the most part, weaker than those  
398 observed amongst the suicidal thoughts and behaviors themselves ( $r_g = 0.53-0.84$ ) (shown in  
399 Table S5).

400  
401 While genetic liability to broad sense self-harm ideation, non-fatal suicide attempt, death by  
402 suicide and depression were all associated with greater likelihood of several suicidal thoughts  
403 and behaviors, the finding that these associations even remain significant in some multi-PRS  
404 models indicates that genetic liabilities to depression, broad sense self-harm ideation, non-fatal  
405 suicide attempt and death by suicide independently contribute to variance in observed suicidal  
406 thoughts and behaviors in COGA. While previous work has also shown that predisposition to  
407 suicide attempt has a genetic component independent from depression [18,25], the current  
408 study finds that genetic liability to other suicidal thoughts and behaviors, specifically broad  
409 sense self-harm ideation and death by suicide, also make contributions that are independent  
410 from depression (i.e., both PRS independently contribute to active suicidal ideation, and broad  
411 sense self-harm ideation PRS independently contributes to suicidal ideation). These results add  
412 to evidence from epidemiological studies that have found a family history of suicidal thoughts  
413 and behaviors significantly increases risk of suicidal thoughts and behaviors independently of  
414 family history for psychiatric illness (e.g., depression) [53]. Furthermore, we find that PRS for  
415 suicidal thoughts and behaviors, particularly non-fatal suicide attempt PRS, may be better

416 predictors of some suicidal thoughts and behaviors than PRS for depression. For example, non-  
417 fatal suicide attempt PRS was significantly associated with desire to die and attempt severity  
418 while depression PRS was not, non-fatal suicide attempt PRS showed a stronger association  
419 with active suicidal ideation than depression PRS in univariate models, and depression PRS  
420 was no longer significantly associated with persistent suicidal ideation after accounting for non-  
421 fatal suicide attempt PRS in a multi-PRS model. Thus, studies predicting suicidal thoughts and  
422 behaviors should not rely on depression PRS alone.

423  
424 The death by suicide PRS was predictive of suicidal ideation, active suicidal ideation, suicide  
425 attempt and severity of suicidality in univariable models, although only the association with  
426 active suicidal ideation remained significant in the multi-PRS models. The non-suicidal self-  
427 injury PRS was only predictive of non-suicidal self-injury, suicidal ideation and suicide attempt,  
428 although none of these associations remained significant after accounting for the other  
429 associated PRS. We consider that the relatively smaller sample sizes of the death by suicide  
430 GWAS (N= 18,223, N cases = 3,413) and non-suicidal self-injury GWAS (N= 133,620, N cases=  
431 2,845) may be contributing to the differences observed in the non-suicidal self-injury and death  
432 by suicide PRS, considering that sample size of the discovery GWAS is an important factor in  
433 determining accuracy and predictive power of PRS [49,54]. Based on the SNP-heritability,  
434 prevalence and sample sizes of these traits, we estimate our power to detect an association  
435 between the non-suicidal self-injury PRS and non-suicidal self-injury in COGA to be only 5.6%,  
436 and between the death by suicide PRS and suicide attempt in COGA to be between 40.51%  
437 and 48.99%. Additional factors beyond the smaller sample size of the GWAS may have  
438 influenced our lack of findings for the death by suicide PRS. For instance, individuals who are at  
439 the highest levels of genetic risk for death by suicide may not be adequately represented in a  
440 longitudinal study such as COGA. Furthermore, the death by suicide GWAS included individuals  
441 who died by varied violent and nonviolent means [19], and as such may reflect a highly  
442 heterogeneous set of genetic liabilities [60].

443  
444 We did not observe associations between PRS and several suicidal thoughts and behaviors,  
445 specifically no PRS were significantly associated with endorsing substance use prior to attempt,  
446 requiring medical treatment after attempt, or reporting more than one attempt. Additionally,  
447 several suicidal thoughts and behaviors (e.g., desire to die, persistent suicidal ideation) were  
448 only significantly associated with one or two PRS. While it is possible that these behaviors may  
449 not have as strong of a genetic component, we also consider that the nestedness of these  
450 phenotypes may be contributing to these observations; these suicidal thoughts and behaviors  
451 specifically represent co-occurring behaviors, such that they were only asked of individuals who  
452 had endorsed suicidal ideation or suicide attempt and as such, any individual not endorsing the  
453 prerequisite variable was not included in the follow-up variables (e.g., for requiring medical  
454 treatment after an attempt, the unaffected group only included individuals who had made a  
455 suicide attempt). As a result, the “control” groups for these variables represent an already high-  
456 risk group and we consider that while genetic liability contributes to suicidal thoughts and  
457 behaviors broadly, related features of individual suicidal thoughts and behaviors may not be  
458 influenced by the PRS studied by us. It is also plausible that some features of individual suicide  
459 attempts may be situational; for example, requiring medical treatment after an attempt may  
460 reflect lethality and mode of attempt, which may be environmental in nature [61–63].  
461 Furthermore, individuals with multiple suicide attempts only answered follow-up questions in  
462 reference to their self-defined most serious attempt. For example, an individual may have made  
463 a previous attempt after using substances, but if they had a made a different attempt they  
464 believed to be more serious in which they didn’t use a substance before the attempt, then they  
465 answered no to substance use prior to attempt. As a result, some of the behaviors co-occurring

466 with suicide attempt that we studied may not accurately represent an individuals' history of  
467 these behaviors over their lifetime.

468  
469 In addition to small discovery GWAS sample sizes for some traits and nestedness of some  
470 variables in COGA, we acknowledge various other limitations to this study. First, COGA was  
471 ascertained for families with an extensive history of AUD, and as such is not representative of  
472 the broader population. Since individuals with substance use disorders are at higher risk for  
473 suicidal thoughts and behaviors [64,65], our sample may be enriched for these phenotypes.  
474 Second, concerns of accuracy and limited availability relating to data on family history of suicidal  
475 thoughts and behaviors prevented us from constructing models in which PRS and family history  
476 simultaneously predicted suicidal thoughts or behaviors, a method shown to improve risk  
477 prediction for other disorders [66,67]. Third, as is the case for many PRS, these PRS may be  
478 strongly associated with suicidal thoughts and behaviors at the population scale, but are not  
479 useful for individual level prediction. This is not to say PRS for suicidal thoughts and behaviors  
480 will never be useful for classification purposes, but currently they are not sufficiently powered,  
481 nor have important ethical concerns been addressed [68] for prediction at the individual or  
482 clinical level. Finally, because of the limited non-European ancestry GWAS available for suicidal  
483 thoughts and behavior phenotypes, we were only able to conduct these analyses in a subset of  
484 individuals in COGA with European ancestry, despite the diversity of the full COGA sample.

485  
486 In conclusion, we find evidence that PRS computed from GWAS of non-suicidal self-injury,  
487 broad sense self-harm ideation, non-fatal suicide attempt, death by suicide and depression are  
488 significantly associated with increased risk of suicidal thoughts and behaviors in individuals in  
489 COGA. Results further corroborate that suicidal thoughts and behaviors are heterogeneous and  
490 partially genetically distinct from depression.

#### 491 492 **Acknowledgements**

493 The Collaborative Study on the Genetics of Alcoholism (COGA), Principal Investigators B.  
494 Porjesz, V. Hesselbrock, T. Foroud; Scientific Director, A. Agrawal; Translational Director, D.  
495 Dick, includes eleven different centers: University of Connecticut (V. Hesselbrock); Indiana  
496 University (H.J. Edenberg, T. Foroud, Y. Liu, M.H. Plawecki); University of Iowa Carver College  
497 of Medicine (S. Kuperman, J. Kramer); SUNY Downstate Health Sciences University (B.  
498 Porjesz, J. Meyers, C. Kamarajan, A. Pandey); Washington University in St. Louis (L. Bierut, J.  
499 Rice, K. Bucholz, A. Agrawal); University of California at San Diego (M. Schuckit); Rutgers  
500 University (J. Tischfield, R. Hart, J. Salvatore); The Children's Hospital of Philadelphia,  
501 University of Pennsylvania (L. Almasy); Virginia Commonwealth University (D. Dick); Icahn  
502 School of Medicine at Mount Sinai (A. Goate, P. Slesinger); and Howard University (D. Scott).  
503 Other COGA collaborators include: L. Bauer (University of Connecticut); J. Nurnberger Jr., L.  
504 Wetherill, X. Xuei, D. Lai, S. O'Connor, (Indiana University); G. Chan (University of Iowa;  
505 University of Connecticut); D.B. Chorlian, J. Zhang, P. Barr, S. Kinreich, G. Pandey (SUNY  
506 Downstate); N. Mullins (Icahn School of Medicine at Mount Sinai); A. Anokhin, S. Hartz, E.  
507 Johnson, V. McCutcheon, S. Saccone (Washington University); J. Moore, Z. Pang, S. Kuo  
508 (Rutgers University); A. Merikangas (The Children's Hospital of Philadelphia and University of  
509 Pennsylvania); F. Aliev (Virginia Commonwealth University); H. Chin and A. Parsian are the  
510 NIAAA Staff Collaborators. We continue to be inspired by our memories of Henri Begleiter and  
511 Theodore Reich, founding PI and Co-PI of COGA, and also owe a debt of gratitude to other past  
512 organizers of COGA, including Ting- Kai Li, P. Michael Conneally, Raymond Crowe, and Wendy  
513 Reich, for their critical contributions. This national collaborative study is supported by NIH Grant  
514 U10AA008401 from the National Institute on Alcohol Abuse and Alcoholism (NIAAA) and the  
515 National Institute on Drug Abuse (NIDA).

516

517 **Statement of Ethics**

518 This research was conducted at Washington University in St. Louis under approved IRB  
519 protocol # 201906072. All participants in the COGA sample provided written informed consent.

520

521 **Conflict of Interest Statement**

522 The authors have no conflicts of interest to declare.

523

524 **Funding Sources**

525 ECJ was supported by K01DA051759. NM was supported by a NARSAD Young Investigator  
526 Award from the Brain & Behavior Research Foundation.

527

528 **Author Contributions**

529 ECJ and SMCC designed the project. SMCC performed analyses. ECJ supervised the study. All  
530 authors contributed to interpretation of results. SMCC and ECJ wrote the manuscript and all  
531 authors contributed to editing and revising the manuscript.

532

533 **Data Availability Statement**

534 All previously published summary statistics used in these analyses are publicly available. The  
535 non-suicidal self-injury data were derived from the UK Biobank (<https://www.ukbiobank.ac.uk/>)  
536 under application number 19798. The non-suicidal self-injury GWAS summary statistics  
537 generated in this study are publicly available ([https://github.com/WashU-BG/nssi\\_gwas](https://github.com/WashU-BG/nssi_gwas)).

538

539 **References**

- 540 1. Bernal M, Haro JM, Bernert S, Brugha T, de Graaf R, Bruffaerts R, et al. Risk factors for  
541 suicidality in Europe: Results from the ESEMED study. *Journal of Affective Disorders*.  
542 2007;101(1–3).
- 543 2. Turecki G, Brent DA. Suicide and suicidal behaviour. Vol. 387, *The Lancet*. 2016.
- 544 3. Franklin JC, Ribeiro JD, Fox KR, Bentley KH, Kleiman EM, Huang X, et al. Risk factors  
545 for suicidal thoughts and behaviors: A meta-analysis of 50 years of research.  
546 *Psychological Bulletin*. 2017;143(2).
- 547 4. Gili M, Castellví P, Vives M, de la Torre-Luque A, Almenara J, Blasco MJ, et al. Mental  
548 disorders as risk factors for suicidal behavior in young people: A meta-analysis and  
549 systematic review of longitudinal studies. *Journal of Affective Disorders*. 2019 Feb  
550 15;245:152–62.
- 551 5. Yoshimasu K, Kiyohara C, Miyashita K. Suicidal risk factors and completed suicide:  
552 Meta-analyses based on psychological autopsy studies. *Environmental Health and*  
553 *Preventive Medicine*. 2008 Sep 19;13(5):243–56.
- 554 6. Glenn CR, Nock MK. Improving the Short-Term Prediction of Suicidal Behavior.  
555 *American Journal of Preventive Medicine*. 2014 Sep 1;47(3):S176–80.
- 556 7. Kessler RC, Borges G, Walters EE. Prevalence of and Risk Factors for Lifetime Suicide  
557 Attempts in the National Comorbidity Survey. *Archives of General Psychiatry*. 1999 Jul  
558 1;56(7):617–26.
- 559 8. May AM, David Klonsky E. What Distinguishes Suicide Attempters From Suicide  
560 Ideators? A Meta-Analysis of Potential Factors. *Clinical Psychology: Science and*  
561 *Practice*. 2016;23(1):5–20.
- 562 9. Beck AT, Schuyler D, Herman I. Development of suicidal intent scales. In: *The prediction*  
563 *of suicide*. Oxford, England: Charles Press Publishers; 1974. p. 249, xii, 249–xii.
- 564 10. Suominen K, Isometsä E, Ostamo A, Lönnqvist J. Level of suicidal intent predicts overall  
565 mortality and suicide after attempted suicide: A 12-year follow-up study. *BMC*  
566 *Psychiatry*. 2004;4.
- 567 11. Beautrais AL. Subsequent mortality in medically serious suicide attempts: A 5 year  
568 follow-up. *Australian and New Zealand Journal of Psychiatry*. 2003;37(5).
- 569 12. Beautrais AL. Further Suicidal Behavior Among Medically Serious Suicide Attempters.  
570 *Suicide and Life-Threatening Behavior*. 2004;34(1).
- 571 13. Hall DJ, O’Brien F, Stark C, Pelosi A, Smith H. Thirteen-year follow-up of deliberate  
572 self-harm, using linked data. *British Journal of Psychiatry*. 1998 Mar 2;172(3):239–42.
- 573 14. Parra-Urbe I, Blasco-Fontecilla H, Garcia-Parés G, Martínez-Naval L, Valero-Coppin O,  
574 Cebrià-Meca A, et al. Risk of re-attempts and suicide death after a suicide attempt: A  
575 survival analysis. *BMC Psychiatry*. 2017;17(1).
- 576 15. Nock MK, Borges G, Bromet EJ, Alonso J, Angermeyer M, Beautrais A, et al. Cross-  
577 national prevalence and risk factors for suicidal ideation, plans and attempts. *British*  
578 *Journal of Psychiatry*. 2008;192(2):98–105.
- 579 16. Campos AI, Verweij KJH, Statham DJ, Madden PAF, Maciejewski DF, Davis KAS, et al.  
580 Genetic aetiology of self-harm ideation and behaviour. *Scientific Reports*. 2020;10(1):1–  
581 11.
- 582 17. Strawbridge RJ, Ward J, Ferguson A, Graham N, Shaw RJ, Cullen B, et al. Identification  
583 of novel genome-wide associations for suicidality in UK Biobank, genetic correlation with  
584 psychiatric disorders and polygenic association with completed suicide. *EBioMedicine*.  
585 2019;41:517–25.



- 586 18. Mullins N, Kang J, Campos AI, Coleman JRI, Edwards AC, Galfalvy H, et al. Dissecting  
587 the shared genetic architecture of suicide attempt, psychiatric disorders and known risk  
588 factors. *Biological Psychiatry*. 2022;
- 589 19. Docherty AR, Shabalín AA, DiBlasi E, Monson E, Mullins N, Adkins DE, et al. Genome-  
590 wide association study of suicide death and polygenic prediction of clinical antecedents.  
591 *American Journal of Psychiatry*. 2020;177(10):917–27.
- 592 20. Miller JN, Black DW. Bipolar Disorder and Suicide: a Review. *Current Psychiatry*  
593 *Reports*. 2020 Feb 1;22(2):1–10.
- 594 21. Smith AR, Zuromski KL, Dodd DR. Eating disorders and suicidality: what we know, what  
595 we don't know, and suggestions for future research. *Current Opinion in Psychology*. 2018  
596 Aug 1;22:63–7.
- 597 22. Lee PH, Doyle AE, Li X, Silberstein M, Jung J-Y, Gollub RL, et al. Genetic Association  
598 of Attention-Deficit/Hyperactivity Disorder and Major Depression With Suicidal Ideation  
599 and Attempts in Children: The Adolescent Brain Cognitive Development Study.  
600 *Biological Psychiatry*. 2021;
- 601 23. Johnson EC, Aliev F, Meyers JL, Salvatore JE, Tillman R, Chang Y, et al. Associations  
602 between Suicidal Thoughts and Behaviors and Genetic Liability for Cognitive  
603 Performance, Depression, and Risk-Taking in a High-Risk Sample. *Complex Psychiatry*.  
604 2021;7(1–2):34–44.
- 605 24. Russell AE, Hemani G, Jones HJ, Ford T, Gunnell D, Heron J, et al. An exploration of the  
606 genetic epidemiology of non-suicidal self-harm and suicide attempt. *BMC Psychiatry*.  
607 2021;21(1).
- 608 25. Mullins N, Bigdeli TB, Børglum AD, Coleman JRI, Demontis D, Mehta D, et al. GWAS  
609 of suicide attempt in psychiatric disorders and association with major depression  
610 polygenic risk scores. *American Journal of Psychiatry* [Internet]. 2019;176(8):651–60.  
611 Available from: <https://ajp.psychiatryonline.org/doi/10.1176/appi.ajp.2019.18080957>
- 612 26. Shen H, Gelaye B, Huang H, Rondon MB, Sanchez S, Duncan LE. Polygenic prediction  
613 and GWAS of depression, PTSD, and suicidal ideation/self-harm in a Peruvian cohort.  
614 *Neuropsychopharmacology*. 2020;45(10):1595–602.
- 615 27. Martínez-Levy GA, Campos AI, Rabinowitz JA, García-Marín LM, Benjet C, Méndez E,  
616 et al. Suicidal ideation and planning among Mexican adolescents are associated with  
617 depression polygenic risk scores. *American Journal of Medical Genetics Part B:*  
618 *Neuropsychiatric Genetics*. 2021 Dec 1;186(8):476–84.
- 619 28. Wray NR, Ripke S, Mattheisen M, Trzaskowski M, Byrne EM, Abdellaoui A, et al.  
620 Genome-wide association analyses identify 44 risk variants and refine the genetic  
621 architecture of major depression. *Nature Genetics*. 2018;50(5):668–81.
- 622 29. Howard DM, Adams MJ, Clarke TK, Hafferty JD, Gibson J, Shihali M, et al. Genome-  
623 wide meta-analysis of depression identifies 102 independent variants and highlights the  
624 importance of the prefrontal brain regions. *Nature Neuroscience*. 2019;22(3):343–52.
- 625 30. Colbert SMC, Hatoum AS, Shabalín A, Li QS, Coon H, Nelson EC, et al. Exploring the  
626 genetic overlap of suicide-related behaviors and substance use disorders. *American*  
627 *Journal of Medical Genetics Part B: Neuropsychiatric Genetics*. 2021 Dec 1;186(8):445–  
628 55.
- 629 31. Ruderfer DM, Walsh CG, Aguirre MW, Tanigawa Y, Ribeiro JD, Franklin JC, et al.  
630 Significant shared heritability underlies suicide attempt and clinically predicted  
631 probability of attempting suicide. *Molecular Psychiatry*. 2020;25(10):2422–30.

- 632 32. Kendler KS, Ohlsson H, Sundquist J, Sundquist K, Edwards AC. The sources of parent-  
633 child transmission of risk for suicide attempt and deaths by suicide in Swedish national  
634 samples. *American Journal of Psychiatry*. 2020;177(10):928–35.
- 635 33. Richmond-Rakerd LS, Trull TJ, Gizer IR, McLaughlin K, Scheiderer EM, Nelson EC, et  
636 al. Common genetic contributions to high-risk trauma exposure and self-injurious  
637 thoughts and behaviors. *Psychological Medicine*. 2019;
- 638 34. Lim KX, Krebs G, Rimfeld K, Pingault J-B, Rijdsdijk FV. Investigating the genetic and  
639 environmental aetiologies of non-suicidal and suicidal self-harm: a twin study.  
640 *Psychological Medicine*. 2021 Feb 9;1–11.
- 641 35. Russell AE, Hemani G, Jones HJ, Ford T, Gunnell D, Heron J, et al. An exploration of the  
642 genetic epidemiology of non-suicidal self-harm and suicide attempt. *BMC Psychiatry*.  
643 2021;21(1).
- 644 36. Pan-UKB team. <https://pan.ukbb.broadinstitute.org>. 2020.
- 645 37. Levey DF, Stein MB, Wendt FR, Pathak GA, Zhou H, Aslan M, et al. Bi-ancestral  
646 depression GWAS in the Million Veteran Program and meta-analysis in >1.2 million  
647 individuals highlight new therapeutic directions. *Nature Neuroscience*. 2021;
- 648 38. Bucholz KK, McCutcheon V V., Agrawal A, Dick DM, Hesselbrock VM, Kramer JR, et  
649 al. Comparison of Parent, Peer, Psychiatric, and Cannabis Use Influences Across Stages of  
650 Offspring Alcohol Involvement: Evidence from the COGA Prospective Study. *Alcohol*  
651 *Clin Exp Res*. 2017 Feb 1;41(2):359–68.
- 652 39. Reich T, Edenberg HJ, Goate A, Williams JT, Rice JP, Van Eerdewegh P, et al. Genome-  
653 wide search for genes affecting the risk for alcohol dependence. *American Journal of*  
654 *Medical Genetics - Neuropsychiatric Genetics*. 1998;81(3).
- 655 40. Edenberg HJ. The collaborative study on the genetics of alcoholism: an update. *Alcohol*  
656 *Res Health*. 2002;26(3):214–8.
- 657 41. Bucholz KK, Cadoret R, Cloninger CR, Dinwiddie SH, Hesselbrock VM, Nurnberger JJ,  
658 et al. A new, semi-structured psychiatric interview for use in genetic linkage studies: A  
659 report on the reliability of the SSAGA. *Journal of Studies on Alcohol*. 1994;55(2).
- 660 42. Hesselbrock M, Easton C, Bucholz KK, Schuckit M, Hesselbrock V. A validity study of  
661 the SSAGA - A comparison with the SCAN. *Addiction*. 1999;94(9).
- 662 43. Joiner T, Kalafat J, Draper J, Stokes H, Knudson M, Berman AL, et al. Establishing  
663 Standards for the Assessment of Suicide Risk Among Callers to the National Suicide  
664 Prevention Lifeline. *Suicide and Life-Threatening Behavior* [Internet]. 2007 Jun 1 [cited  
665 2022 Jul 11];37(3):353–65. Available from:  
666 <https://onlinelibrary.wiley.com/doi/full/10.1521/suli.2007.37.3.353>
- 667 44. Lai D, Wetherill L, Bertelsen S, Carey CE, Kamarajan C, Kapoor M, et al. Genome-wide  
668 association studies of alcohol dependence, DSM-IV criterion count and individual criteria.  
669 *Genes, Brain and Behavior*. 2019;18(6).
- 670 45. Edwards AC, Ohlsson H, Mościcki E, Crump C, Sundquist J, Lichtenstein P, et al. On the  
671 Genetic and Environmental Relationship Between Suicide Attempt and Death by Suicide.  
672 *Am J Psychiatry*. 2021;178(11).
- 673 46. Zhou W, Nielsen JB, Fritsche LG, Dey R, Gabrielsen ME, Wolford BN, et al. Efficiently  
674 controlling for case-control imbalance and sample relatedness in large-scale genetic  
675 association studies. *Nature Genetics*. 2018;50(9).
- 676 47. Willer CJ, Li Y, Abecasis GR. METAL: Fast and efficient meta-analysis of genomewide  
677 association scans. *Bioinformatics*. 2010;26(17).

- 678 48. Ge T, Chen CY, Ni Y, Feng YCA, Smoller JW. Polygenic prediction via Bayesian  
679 regression and continuous shrinkage priors. *Nature Communications*. 2019;10(1).
- 680 49. Schultz LM, Merikangas AK, Ruparel K, Jacquemont S, Glahn DC, Gur RE, et al.  
681 Stability of polygenic scores across discovery genome-wide association studies. *Human*  
682 *Genetics and Genomics Advances*. 2022 Apr 14;3(2):100091.
- 683 50. Chang CC, Chow CC, Tellier LCAM, Vattikuti S, Purcell SM, Lee JJ. Second-generation  
684 PLINK: Rising to the challenge of larger and richer datasets. *Gigascience*.  
685 2015;4(1):s13742-015.
- 686 51. Nakagawa S, Schielzeth H. A general and simple method for obtaining R<sup>2</sup> from  
687 generalized linear mixed-effects models. *Methods in Ecology and Evolution*. 2013 Feb  
688 1;4(2):133–42.
- 689 52. Bulik-Sullivan B, Finucane HK, Anttila V, Gusev A, Day FR, Loh PR, et al. An atlas of  
690 genetic correlations across human diseases and traits. *Nature Genetics* [Internet].  
691 2015;47(11):1236–41. Available from: <https://www.nature.com/articles/ng.3406>
- 692 53. Qin P, Agerbo E, Mortensen PB. Suicide risk in relation to family history of completed  
693 suicide and psychiatric disorders: a nested case-control study based on longitudinal  
694 registers. *The Lancet*. 2002 Oct 12;360(9340):1126–30.
- 695 54. Chatterjee N, Wheeler B, Sampson J, Hartge P, Chanock SJ, Park JH. Projecting the  
696 performance of risk prediction based on polygenic analyses of genome-wide association  
697 studies. *Nature Genetics*. 2013;45(4).
- 698 55. Maciejewski DF, Creemers HE, Lynskey MT, Madden PAF, Heath AC, Statham DJ, et al.  
699 Overlapping genetic and environmental influences on nonsuicidal self-injury and suicidal  
700 ideation: Different outcomes, same etiology? *JAMA Psychiatry*. 2014;71(6).
- 701 56. Mars B, Heron J, Crane C, Hawton K, Kidger J, Lewis G, et al. Differences in risk factors  
702 for self-harm with and without suicidal intent: Findings from the ALSPAC cohort. *Journal*  
703 *of Affective Disorders*. 2014;168.
- 704 57. Glenn CR, Klonsky ED. Social context during non-suicidal self-injury indicates suicide  
705 risk. *Personality and Individual Differences*. 2009;46(1).
- 706 58. Muehlenkamp JJ, Gutierrez PM. Risk for suicide attempts among adolescents who engage  
707 in non-suicidal self-injury. *Archives of Suicide Research*. 2007;11(1).
- 708 59. Kim KL, Cushman GK, Weissman AB, Puzia ME, Wegbreit E, Tone EB, et al.  
709 Behavioral and emotional responses to interpersonal stress: A comparison of adolescents  
710 engaged in non-suicidal self-injury to adolescent suicide attempters. *Psychiatry Research*.  
711 2015;228(3).
- 712 60. Punzi G, Ursini G, Chen Q, Radulescu E, Tao R, Huuki LA, et al. Genetics and Brain  
713 Transcriptomics of Completed Suicide. <https://doi.org/10.1176/appi.ajp.2021.21030299>.  
714 2022 Mar 3;179(3):226–41.
- 715 61. Ajdacic-Gross V, Weiss MG, Ring M, Hepp U, Bopp M, Gutzwiller F, et al. Methods of  
716 suicide: international suicide patterns derived from the WHO mortality database. *Bull*  
717 *World Health Organ*. 2008;86(9).
- 718 62. Fischer EP, Comstock GW, Monk MA, Sencer DJ. Characteristics of Completed Suicides:  
719 Implications of Differences Among Methods. *Suicide and Life-Threatening Behavior*.  
720 1993 Jun 1;23(2):91–100.
- 721 63. Klieve H, Barnes M, De Leo D. Controlling firearms use in Australia: Has the 1996 gun  
722 law reform produced the decrease in rates of suicide with this method? *Social Psychiatry*  
723 *and Psychiatric Epidemiology*. 2009 Oct 4;44(4):285–92.

- 724 64. Crump C, Sundquist J, Kendler KS, Edwards AC, Sundquist K. Comparative risk of  
725 suicide by specific substance use disorders: A national cohort study. *Journal of Psychiatric*  
726 *Research*. 2021 Dec 1;144:247–54.
- 727 65. Nock MK, Hwang I, Sampson NA, Kessler RC. Mental disorders, comorbidity and  
728 suicidal behavior: Results from the National Comorbidity Survey Replication. *Molecular*  
729 *Psychiatry* 2010 15:8 [Internet]. 2009 Mar 31 [cited 2022 Jul 17];15(8):868–76. Available  
730 from: <https://www.nature.com/articles/mp200929>
- 731 66. Do CB, Hinds DA, Francke U, Eriksson N. Comparison of Family History and SNPs for  
732 Predicting Risk of Complex Disease. *PLOS Genetics*. 2012 Oct;8(10):e1002973.
- 733 67. Lu Y, Pouget JG, Andreassen OA, Djurovic S, Esko T, Hultman CM, et al. Genetic risk  
734 scores and family history as predictors of schizophrenia in Nordic registers. *Psychological*  
735 *Medicine*. 2018 May 1;48(7):1201–8.
- 736 68. Docherty A, Kious B, Brown T, Francis L, Stark L, Keeshin B, et al. Ethical concerns  
737 relating to genetic risk scores for suicide. *American Journal of Medical Genetics Part B:*  
738 *Neuropsychiatric Genetics*. 2021 Dec 1;186(8):433–44.
- 739

#### 740 **Figure Captions**

741 **Figure 1. Average PRS for individuals exhibiting specific Suicidal thoughts and**  
742 **behaviors.** PRS studied were non-suicidal self-injury, self-harm ideation, suicide attempt, death  
743 by suicide and depression. Dots represent average PRS residuals after regressing out  
744 covariates and bars represent standard errors. Dark blue dots represent average PRS in the  
745 affected groups, while light blue dots represent average PRS in the unaffected groups. Asterisks  
746 indicate associations that are significant (see Table 2). A) average PRS residuals for non-  
747 suicidal self-injury, B) average PRS residuals for self-harm ideation, C) average PRS residuals  
748 for non-fatal suicide attempt, D) average PRS residuals for death by suicide, E) average PRS  
749 residuals depression.

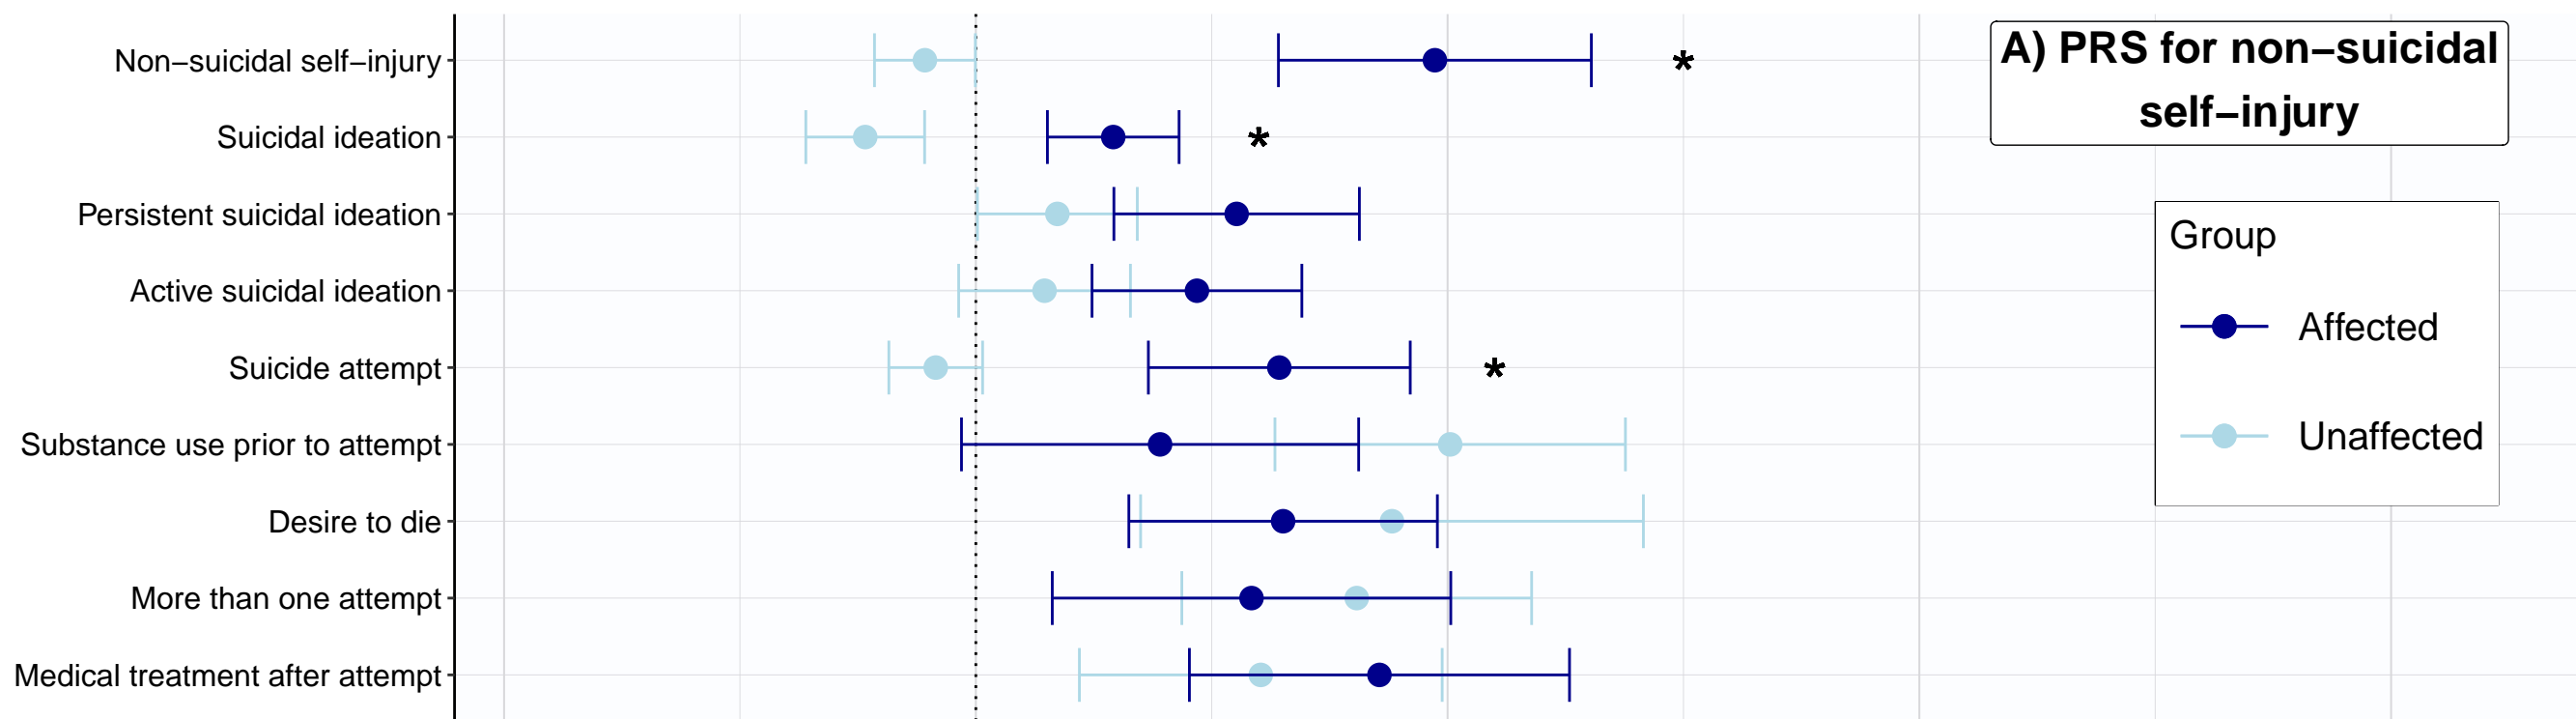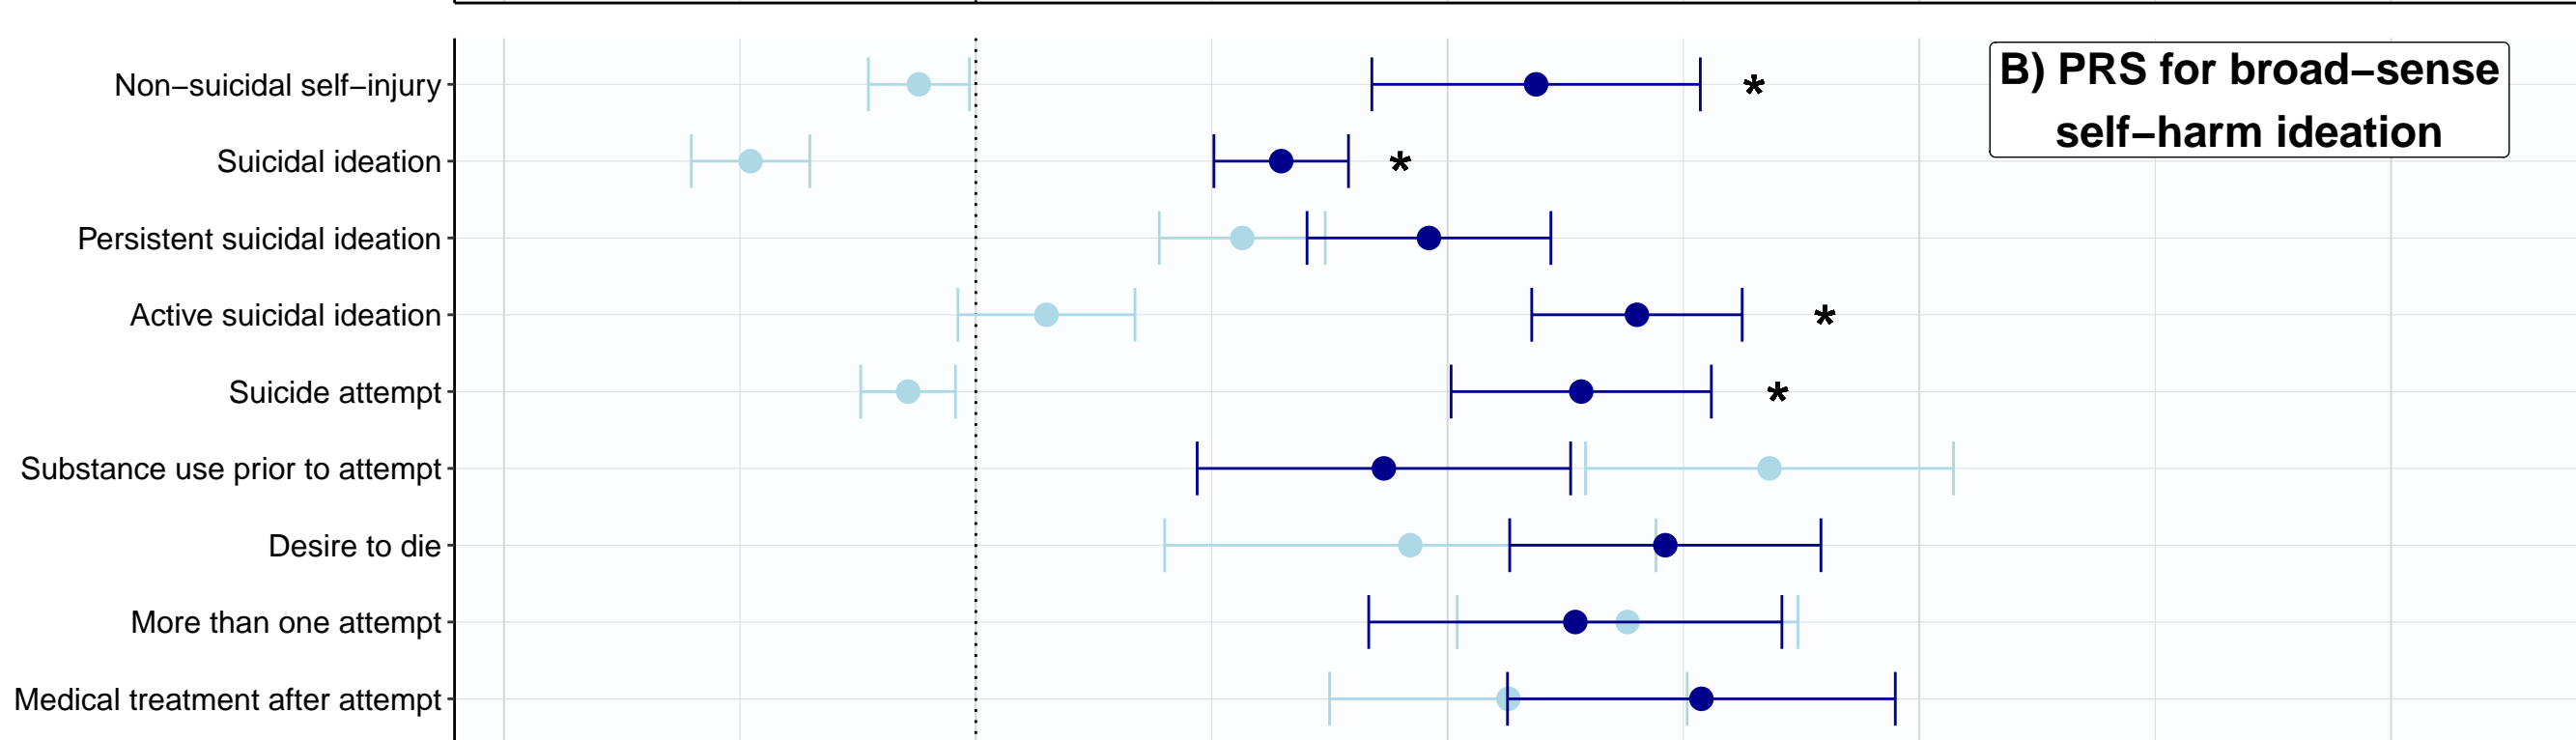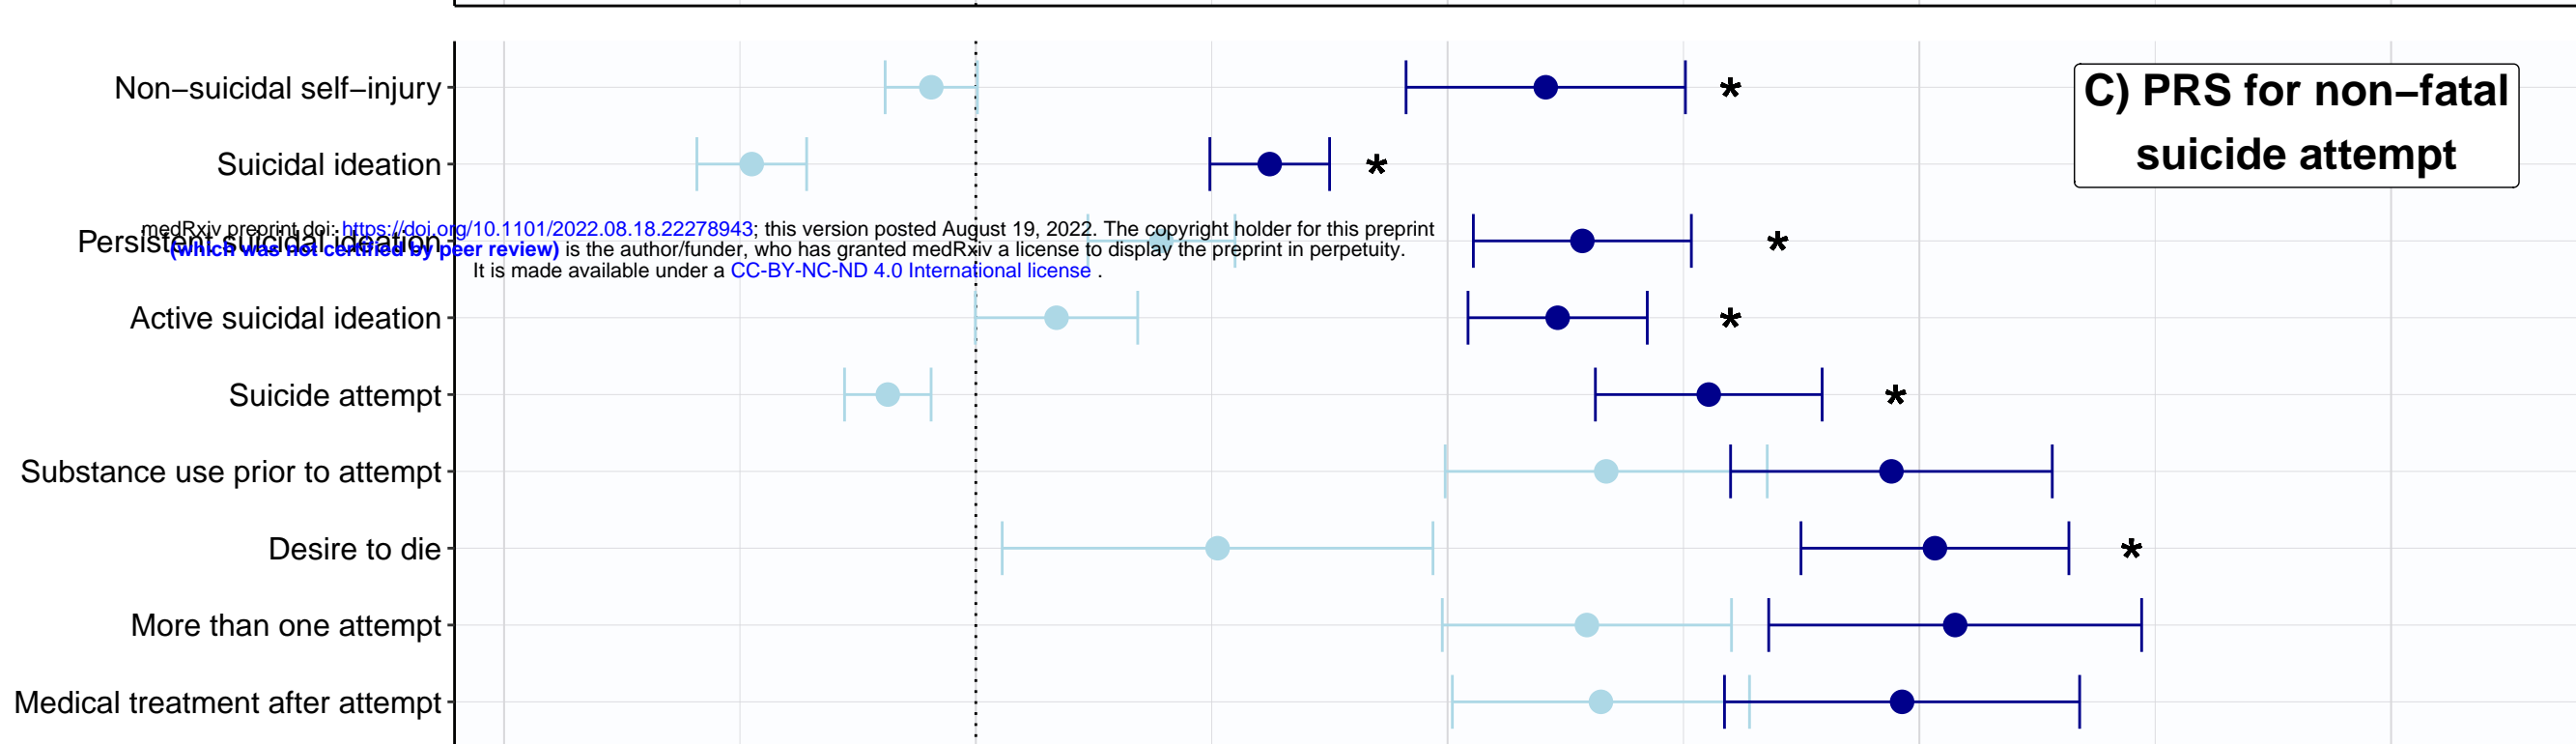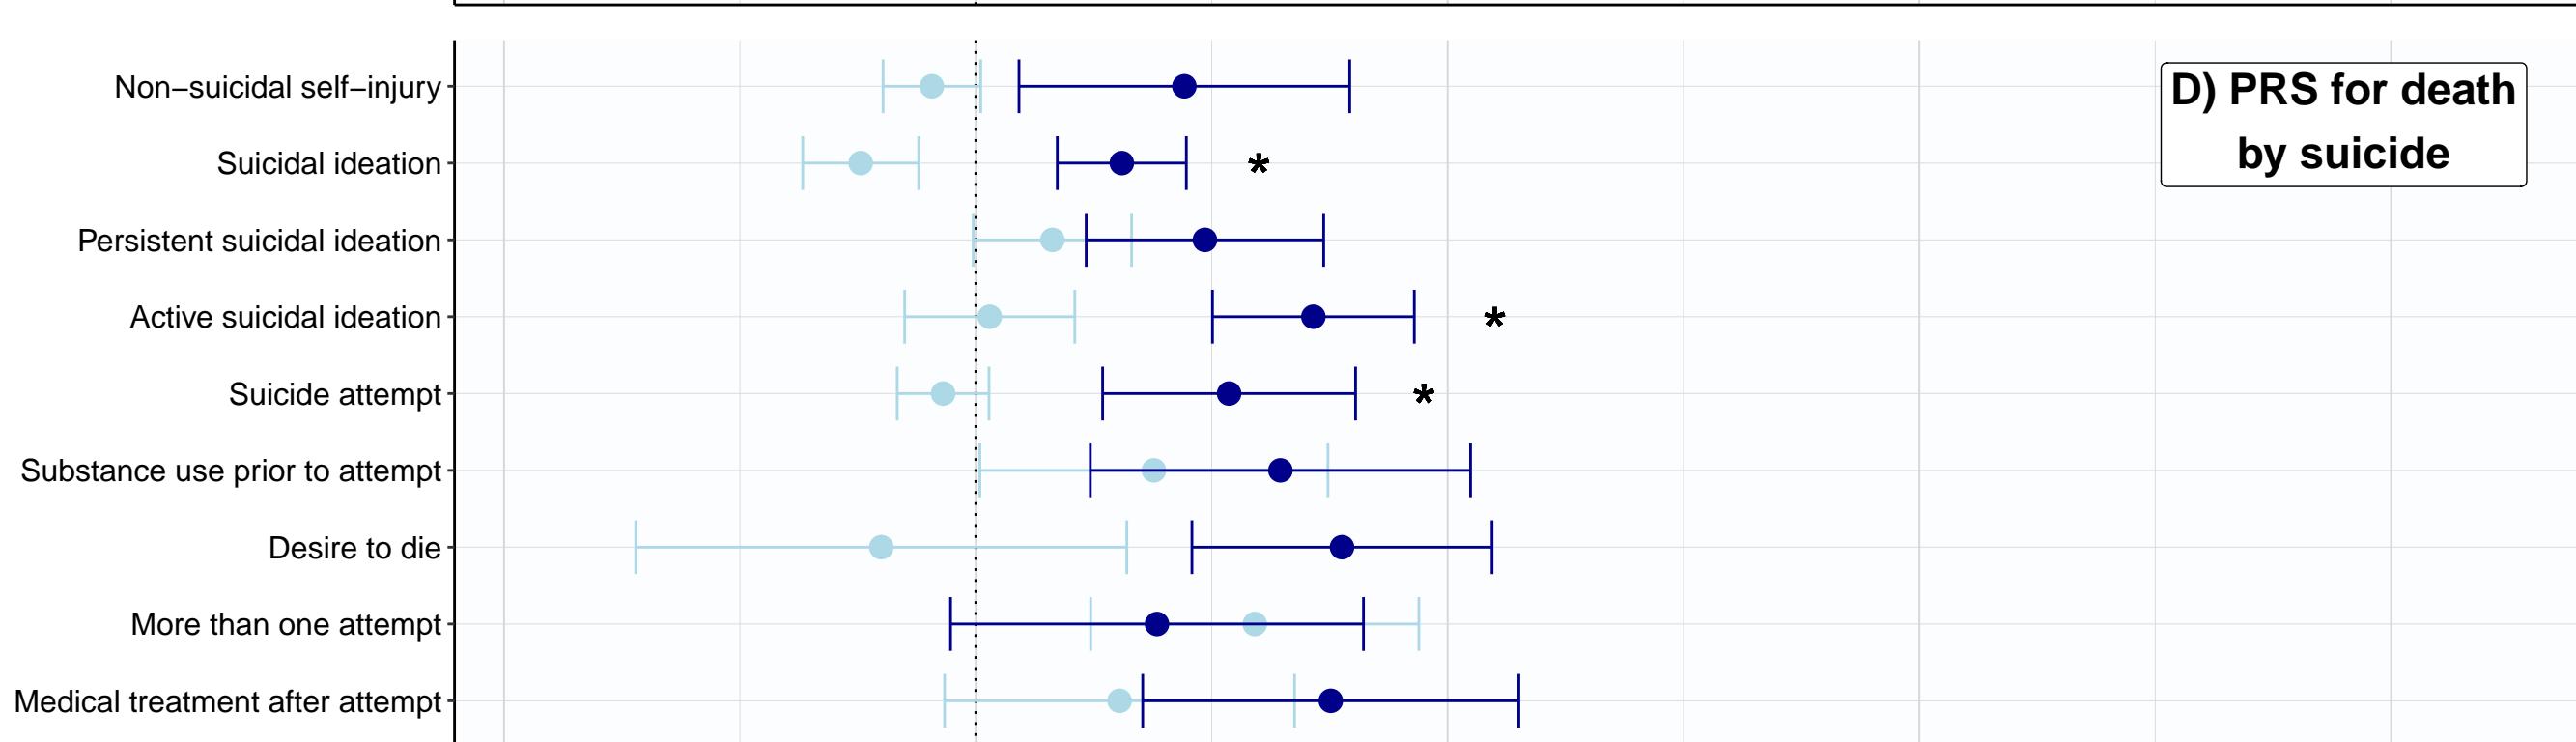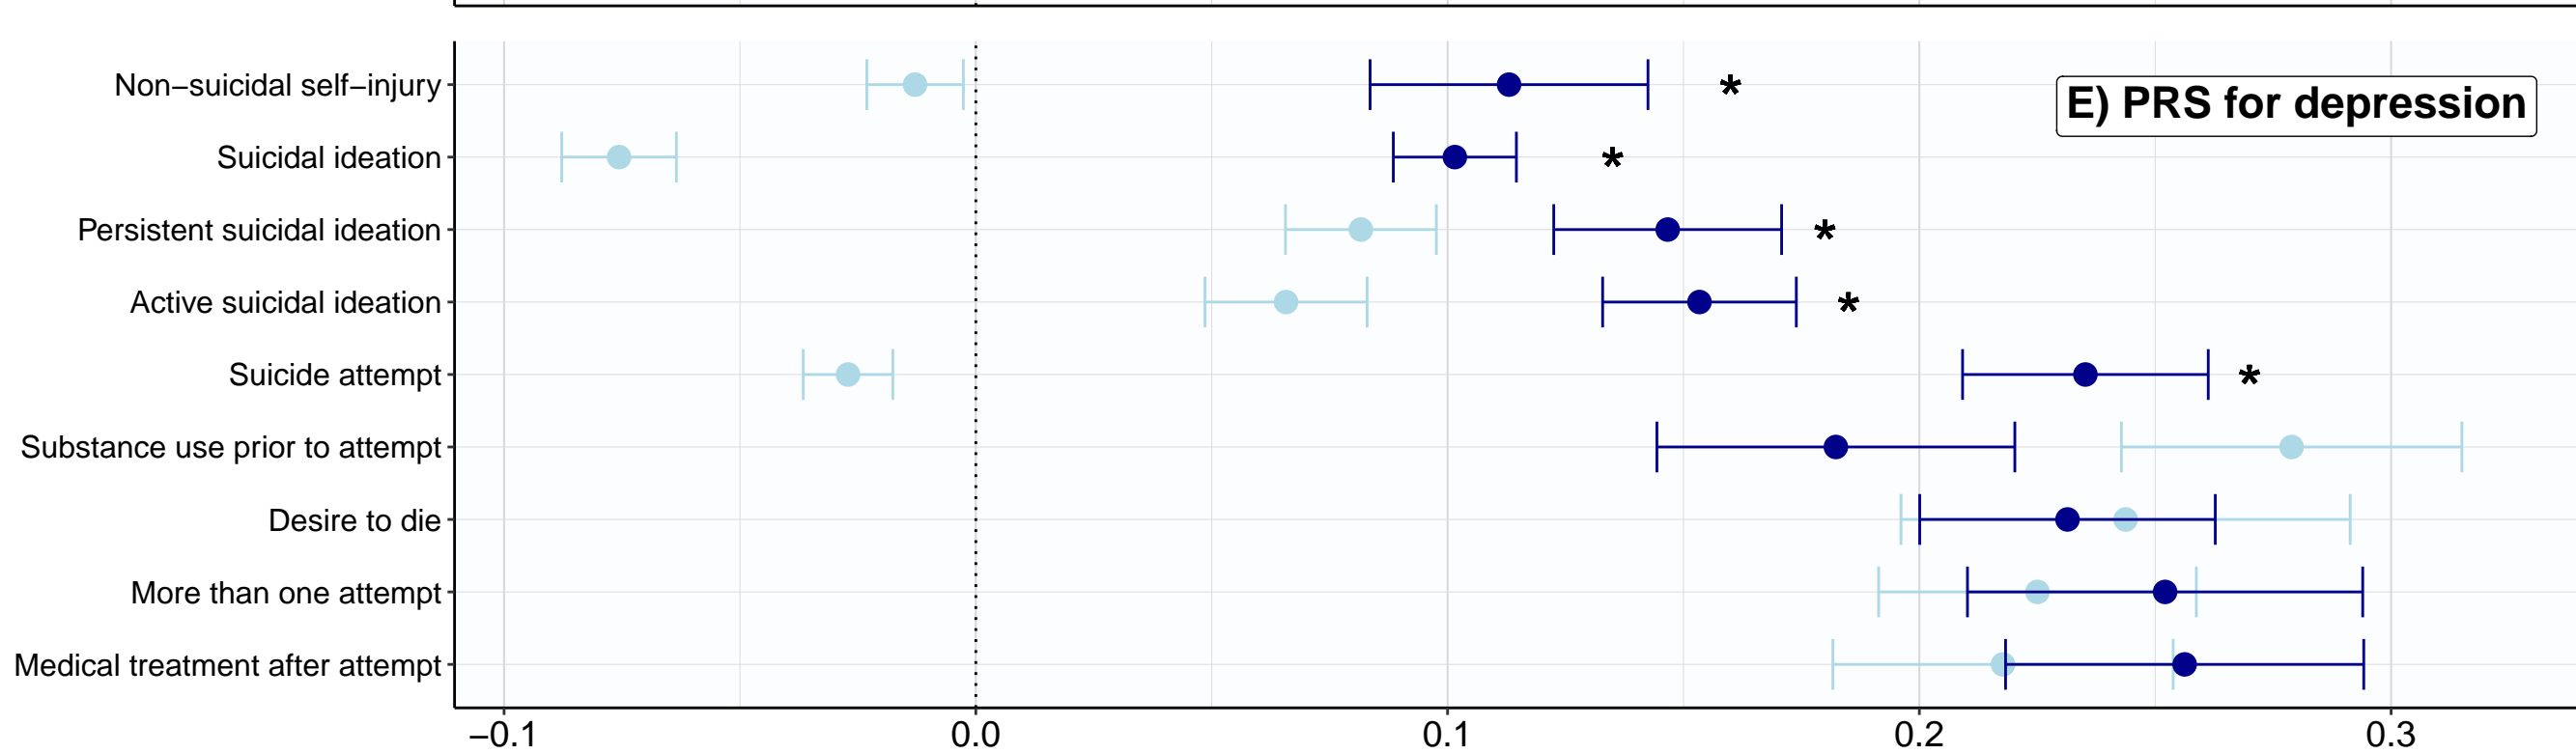

Source: https://medrxiv.org/content/10.1101/2022.08.18.22278943v1.full.pdf
